# Supplementary material for: Psoriatic arthritis subtypes are phenocopied in humanized mice
Source: JCI journal article supplement (doi:10.1172/jci.insight.178213), 2024-07-02
Supplement: sd1 [file 1]

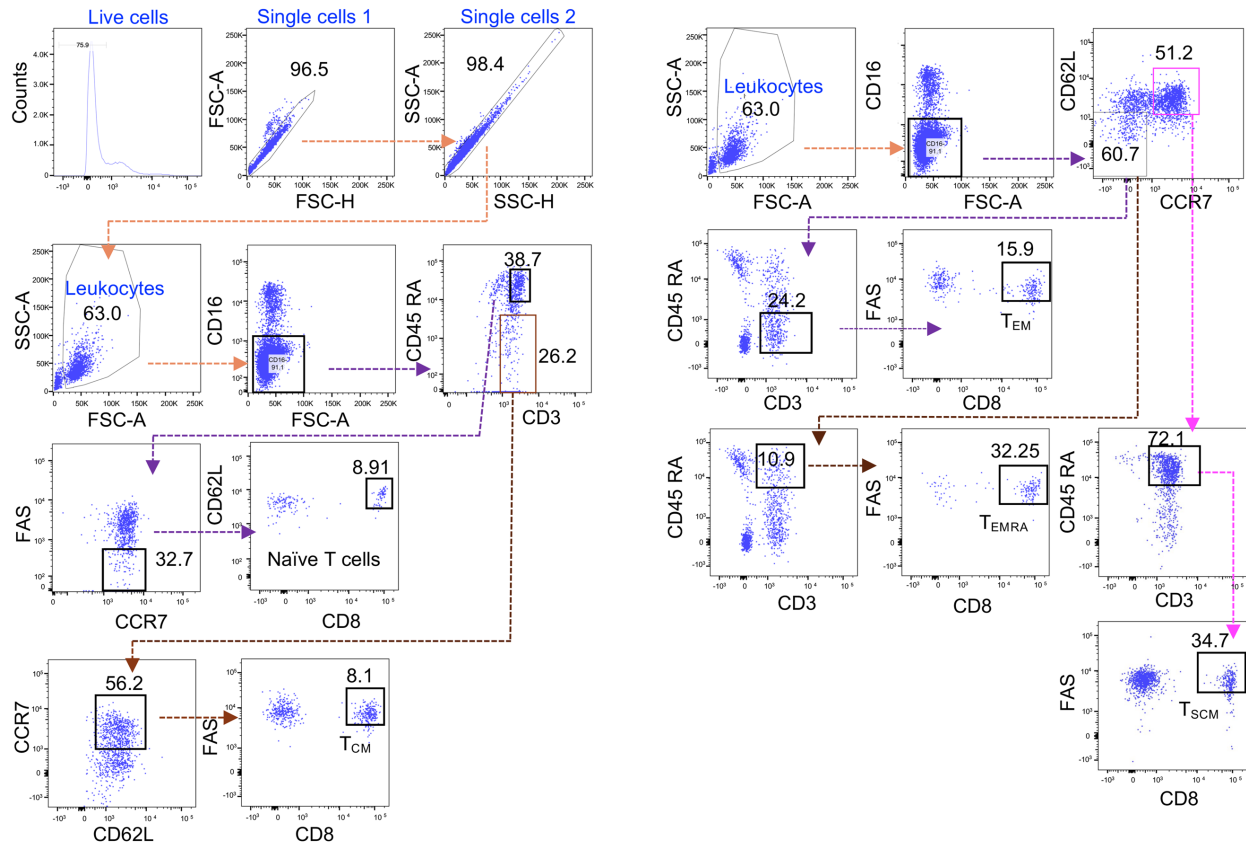

Supplementary figure 1. Gating strategy for identifying CD8 T cell subsets in the blood of patients and humanized mice. Representative dot plots showing the gating strategy to define circulating CD8 T cell subsets (naïve,  $T_{SCM}$ ,  $T_{CM}$ ,  $T_{EM}$  and  $T_{EMRA}$ ) in a PsO patient. Dead cells, doublets (single cells 1 & 2) and  $CD16^+$  cells were excluded from the flow cytometry analysis. Leukocytes were gated based on the forward and side scatter features: size and granularity. Naïve T cells:  $CD3^+CD8^+CD45RA^+CD95^+CCR7^+CD62L^+$ .  $T_{CM}$ :  $CD3^+CD8^+CD45RA^+CD95^+CCR7^+CD62L^+$ ,  $T_{EM}$ :  $CD3^+CD8^+CD45RA^+CD95^+CCR7^-CD62L^-$ ,  $T_{EMRA}$ :  $CD3^+CD8^+CD45RA^+CD95^+CCR7^-CD62L^-$ ,  $T_{SCM}$ :  $CD3^+CD8^+CD45RA^+CD95^+CCR7^+CD62L^+$ . The same strategy was applied to define circulating CD8 T cells in PsA patients or the blood of humanized PsO or PsA mice.

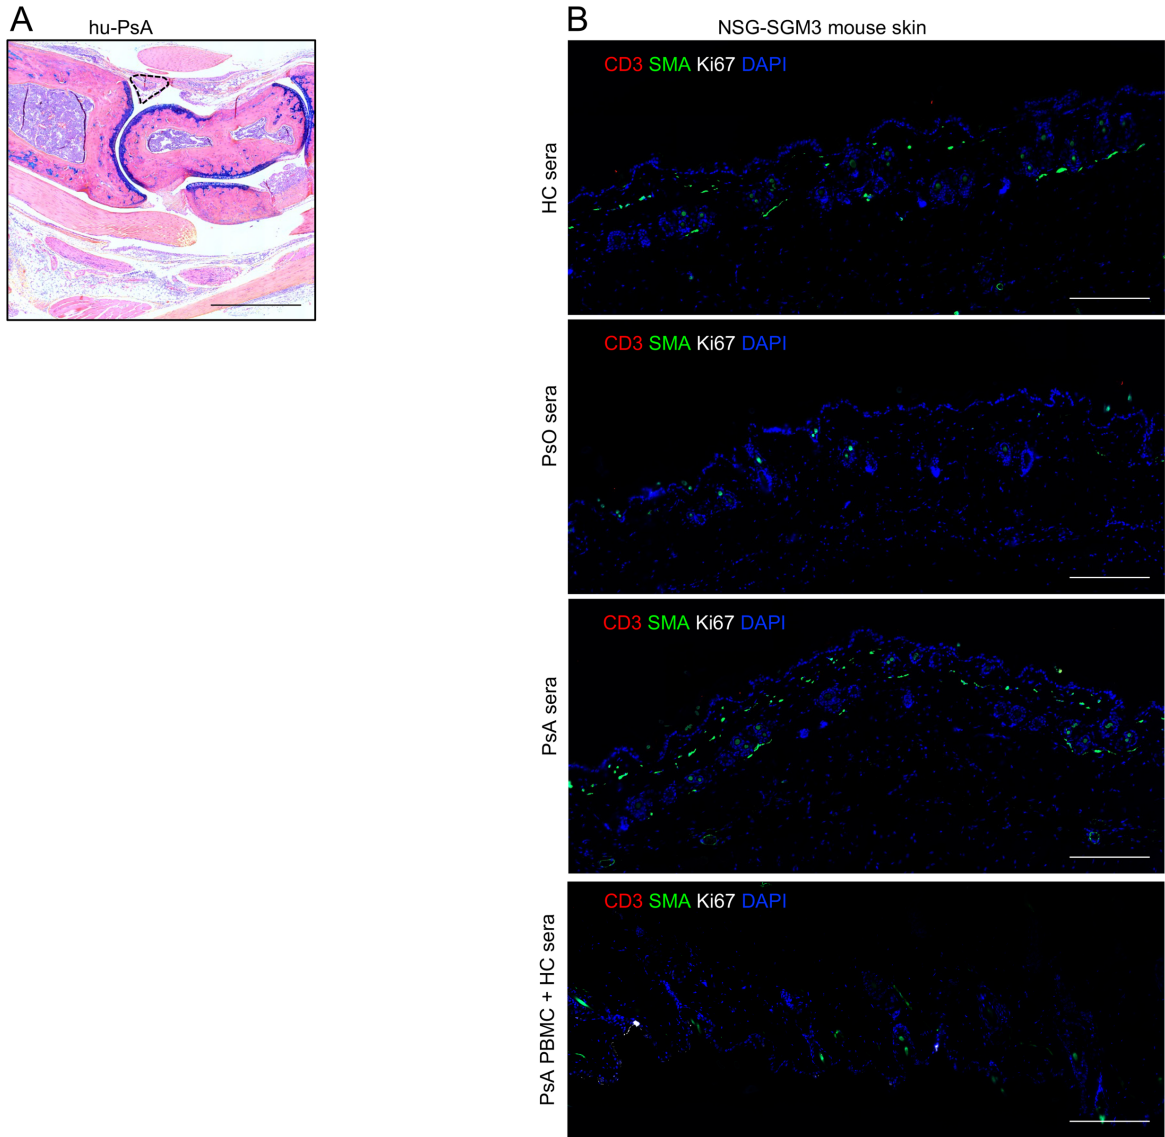

Supplementary figure 2. Transfer of sera or PBMC into NSG-SGM3 mice failed to induce psoriasiform plaques but triggered synovitis. **A)** A 4  $\mu$ m ankle tissue section stained with Alcian blue shows modest cell infiltration only in the ankle of an NSG-SGM3 mouse injected with PBMC from a PsA patient and PBS instead of sera. Scale bar = 1000  $\mu$ m. **B)** Four groups of NSG-SGM3 mice were injected with 1) 150  $\mu$ L of sera from healthy (top panel) and 2) PsO or PsA donors (middle panels). The fourth group of mice was engrafted with 150  $\mu$ L of sera from a healthy donor and PBMC from a PsA patient (bottom panel). 4  $\mu$ m skin tissue sections were probed with anti-CD3 (red),  $\alpha$ SMA (green) and Ki67 (white). Pictures show no induction of psoriasiform plaques. Representative 6 x 5 mosaic pictures, taken at 200X magnification with a Zeiss Axioplan microscope and recorded with a Hamamatsu camera, show the absence of infiltrating CD3<sup>+</sup> T cells (red).

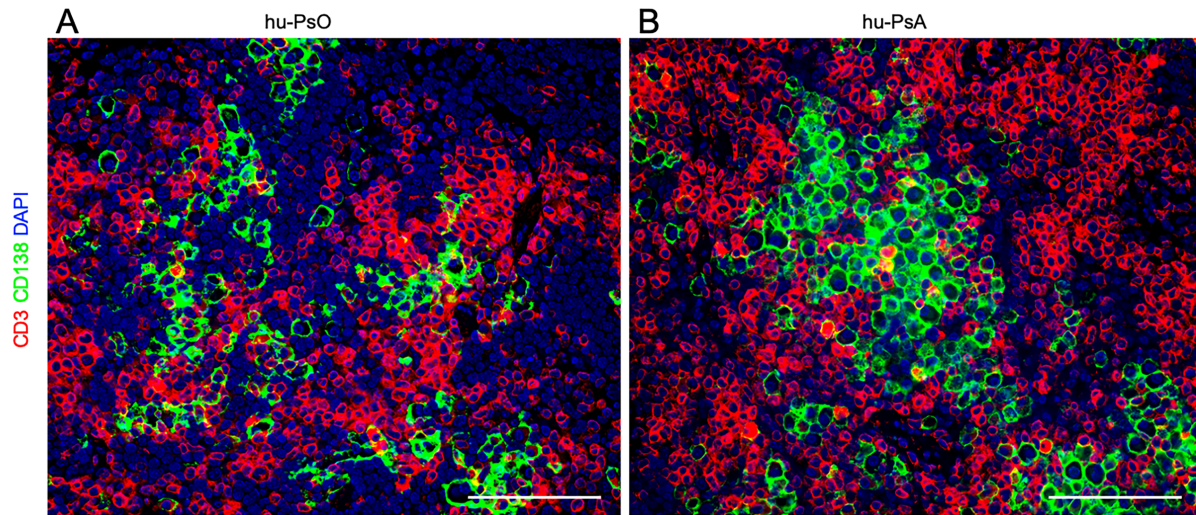

Supplementary figure 3. CD138<sup>+</sup> plasma cells of PsA patients efficiently colonize splenic niches in immunodeficient NSG-SGM3 mice.  $1.1 \times 10^7$  PBMC and 150  $\mu$ L of sera from **A**) PsO and **B**) PsA patients were transferred into NSG-SGM3 mice. Day 30 post-transfer: spleens were collected, fixed in neutral buffered formalin and embedded in paraffin. 4  $\mu$ m spleen sections were probed with antibodies for CD3 (red) and CD138 (green). Nuclei were labeled with DAPI. Representative pictures show the efficient colonization by circulating CD3<sup>+</sup> T cells and CD138<sup>+</sup> plasma cells from PsO and PsA patients in the spleen of NSG-SGM3 mice. The scale bar represents 100  $\mu$ m.

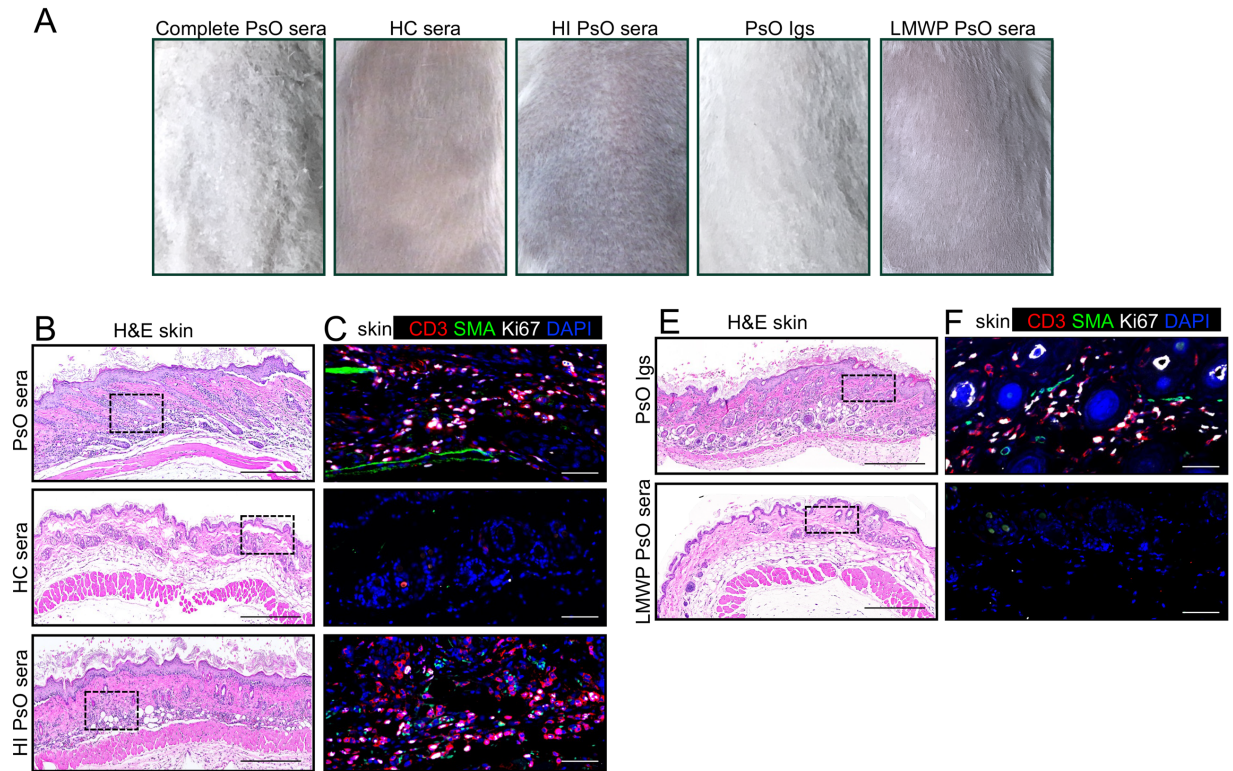

Supplementary figure 4. Immunoglobulins are essential to induce psoriasiform lesions in hu-PsO mice. **A)** Photographs of hu-PsO mice injected with complete and heat, inactivated sera or immunoglobulins show psoriasiform development, **B, E)** increased epidermal thickness and **C, F)** significant accumulation of proliferating CD3 T cells (CD3: red, Ki67: white) compared to mice injected with low molecular weight proteins or HC sera. The Graph depicts the average  $\pm$  SD,  $n = 4$  per experimental group. Representative H&E pictures were taken with an Olympus VS120 scanner. Scale bar = 1000  $\mu$ m. Immunofluorescence 200x magnification pictures were taken with a Zeiss Axioplan microscope and recorded with a Hamamatsu camera. Scale bar = 200  $\mu$ m.
